# Supplementary material for: Hazardous Heavy Metals Accumulation and Health Risk Assessment of Different Vegetable Species in Contaminated Soils from a Typical Mining City, Central China
Source: PubMed Central journal article supplement (PMC7967305; doi:10.3390/ijerph18052617), 2021-03-05
Supplement: ijerph-18-02617-s001.pdf [file ijerph-18-02617-s001.pdf]

# Hazardous Heavy Metals Accumulation and Health Risk Assessment of Different Vegetable Species in Contaminated Soils from a Typical Mining City, Central China

Zhen Wang <sup>1,2</sup>, Jianguo Bao <sup>1,\*</sup>, Tong Wang <sup>1</sup>, Haseeb Tufail Moryani <sup>1</sup>, Wei Kang <sup>2,\*</sup>, Jin Zheng <sup>2</sup>, Changlin Zhan <sup>2</sup> and Wensheng Xiao <sup>2</sup>

<sup>1</sup> School of Environmental Studies, China University of Geosciences, Wuhan 430074, China; wz5781@126.com (Z.W.); wangtong\_1013@126.com (T.W.); haseebmoryani@cug.edu.cn (H.T.M.)

<sup>2</sup> School of Environmental Science and Engineering, Hubei Key Laboratory of Mine Environment Pollution Control and Remediation, Hubei Polytechnic University, Huangshi 435003, China; zhengjin0202@126.com (J.Z.); chl\_zhan@126.com (C.Z.); wsxiao2002@126.com (W.X.)

\* Correspondence: bjianguo@cug.edu.cn (J.B.); kangwei@hbpu.edu.cn (W.K.)

## Supplementary Materials

### List

1. Table S1: Results of single-factor index and Nemerow's synthetical pollution index.
2. Table S2: Concentration (mg/kg, Fresh weight) of heavy metals in the foodstuffs of the four categories of vegetable gardens.
3. Table S3: The assessment criteria in edible parts of different vegetables (mg/kg).
4. Table S4: Principal component analysis for heavy metals of soils.
5. Table S5: Indices of non-carcinogenic risk for children.
6. Figure S1: Potential ecological risk index (RI) of single element in the four zones: (a) Non-ferrous metals smelter; (b) Abandoned copper mine; (c) Limestone quarry; (d) Iron mine.
7. Figure S2: Spatial distribution pollution levels of Igeo-Cu in the four zones: (a) Non-ferrous metals smelter; (b) Abandoned copper mine; (c) Limestone quarry; (d) Iron mine.
8. Figure S3: Spatial distribution pollution levels of Igeo-Cr in the four zones: (a) Non-ferrous metals smelter; (b) Abandoned copper mine; (c) Limestone quarry; (d) Iron mine.
9. Figure S4: Spatial distribution pollution levels of Igeo-Pb in the four zones: (a) Non-ferrous metals smelter; (b) Abandoned copper mine; (c) Limestone quarry; (d) Iron mine.
10. Figure S5: Spatial distribution pollution levels of Igeo-As in the four zones: (a) Non-ferrous metals smelter; (b) Abandoned copper mine; (c) Limestone quarry; (d) Iron mine.
11. Figure S6: Correlation coefficients of heavy metals between soils and foodstuffs: (a) Non-ferrous metals smelter; (b) Abandoned copper mine; (c) Limestone quarry; (d) Iron mine..
12. Figure S7: Principal component analysis for heavy metals of soils in the four zones: (a) Non-ferrous metals smelter; (b) Abandoned copper mine; (c) Limestone quarry; (d) Iron mine..
13. Figure S8: Cluster analysis (CA) results for five heavy metals of soils: (a) Non-ferrous metals smelter; (b) Abandoned copper mine; (c) Limestone quarry; (d) Iron mine.
14. Figure S9: The health risk contribution rates of five different elements in the four zones: (a) Non-ferrous metals smelter; (b) Abandoned copper mine; (c) Limestone quarry; (d) Iron mine..

**Table S1.** Results of single-factor index and Nemerow's synthetical pollution index.

| Sampling Areas                          |      | $P_{Cu}$ | $P_{Cr}$ | $P_{Pb}$ | $P_{Cd}$ | $P_{As}$ | $P_n$ | Class |
|-----------------------------------------|------|----------|----------|----------|----------|----------|-------|-------|
| Non-ferrous metals smelter ( $n = 21$ ) | Min  | 1.16     | 0.31     | 0.23     | 4.33     | 2.52     | 3.24  | V     |
|                                         | Max  | 8.59     | 0.97     | 1.83     | 25.05    | 0.15     | 18.44 |       |
|                                         | Mean | 4.75     | 0.39     | 1.14     | 12.98    | 1.42     | 9.64  |       |
| Abandoned copper mine ( $n = 26$ )      | Min  | 3.26     | 0.33     | 0.28     | 0.50     | 0.10     | 2.49  | IV~V  |
|                                         | Max  | 24.64    | 0.88     | 2.48     | 10.94    | 3.97     | 17.95 |       |
|                                         | Mean | 12.25    | 0.59     | 1.12     | 4.48     | 1.29     | 9.40  |       |
| Limestone quarry ( $n = 20$ )           | Min  | 0.75     | 0.03     | 0.16     | 0.66     | 0.12     | 0.67  | II~IV |
|                                         | Max  | 1.24     | 0.50     | 0.61     | 3.44     | 1.84     | 2.60  |       |
|                                         | Mean | 0.94     | 0.28     | 0.36     | 1.84     | 1.03     | 1.46  |       |
| Iron mine ( $n = 23$ )                  | Min  | 0.40     | 0.33     | 0.52     | 0.16     | 0.00     | 0.56  | I~III |
|                                         | Max  | 1.29     | 0.54     | 1.09     | 2.50     | 0.98     | 1.87  |       |
|                                         | Mean | 0.73     | 0.39     | 0.75     | 1.17     | 0.16     | 1.06  |       |

**Table S2.** Concentration (mg/kg, Fresh weight) of heavy metals in the foodstuffs of the four categories of vegetable gardens.

| Elements | Non-Ferrous Metals Smelter<br>(A Zone) | Abandoned Copper Mine<br>(B Zone) | Limestone Quarry<br>(C Zone) | Iron Mine<br>(D Zone) |
|----------|----------------------------------------|-----------------------------------|------------------------------|-----------------------|
| Cu       | $2.32 \pm 2.06b$                       | $4.05 \pm 1.96a$                  | * $1.50 \pm 1.54b$           | $1.28 \pm 0.78b$      |
| Cr       | * $0.08 \pm 0.09b$                     | $0.13 \pm 0.08ab$                 | $0.22 \pm 0.21a$             | $0.08 \pm 0.06b$      |
| Pb       | * $0.41 \pm 0.45a$                     | * $0.17 \pm 0.25b$                | * $0.19 \pm 0.19ab$          | $0.08 \pm 0.06b$      |
| Cd       | * $0.15 \pm 0.16a$                     | $0.14 \pm 0.13a$                  | $0.12 \pm 0.08a$             | $0.05 \pm 0.04b$      |
| As       | $0.22 \pm 0.19a$                       | $0.26 \pm 0.22a$                  | * $0.18 \pm 0.18a$           | $0.03 \pm 0.02b$      |

Fresh weight can be transformed by water percent and dry weight. The value shown is mean  $\pm$  S.D. \* coefficients of variation (CV)  $\geq 1$ . The different small letters in the same row stand for statistical significance at  $p < 0.05$ .

**Table S3.** The assessment criteria in edible parts of different vegetables (mg/kg, Fresh weight).

| NO. | Types              | Cu | Cr    | Pb  | Cd   | As    |
|-----|--------------------|----|-------|-----|------|-------|
| 1   | Solanaceous fruits | 10 | 0.5   | 0.1 | 0.05 | 0.5   |
| 2   | Leafy vegetables   | 10 | 0.5   | 0.3 | 0.2  | 0.5   |
| 3   | Nuts               | 10 | (0.5) | 0.2 | 0.5  | (0.5) |
| 4   | Rhizome geophytes  | 10 | (0.5) | 0.2 | 0.1  | 0.5   |
| 5   | Cereals            | 10 | 1.0   | 0.2 | 0.1  | 0.5   |
| 6   | Legumes            | 10 | 1.0   | 0.2 | 0.2  | -     |

The threshold value of vegetables would refer to GB2762-2017 for Pb, Cd, As, Cr, GB13106-91 for Cu (10 mg/kg).

**Table S4.** Principal component analysis for heavy metals of soils.

| Sampling Areas                      | Components | Initial Eigenvalues |                          |              |
|-------------------------------------|------------|---------------------|--------------------------|--------------|
|                                     |            | Total               | Percentage of Variance/% | Cumulative/% |
| Non-ferrous metals smelter (A zone) | 1          | 3.48                | 69.70                    | 69.70        |
|                                     | 2          | 1.11                | 22.13                    | 91.83        |
|                                     | 3          | 0.21                | 4.21                     | 96.04        |
|                                     | 4          | 0.12                | 2.48                     | 98.51        |
|                                     | 5          | 0.07                | 1.49                     | 100.00       |
| Abandoned copper mine (B zone)      | 1          | 2.46                | 49.13                    | 49.13        |
|                                     | 2          | 1.16                | 23.14                    | 72.28        |
|                                     | 3          | 0.83                | 16.58                    | 88.85        |
|                                     | 4          | 0.36                | 7.25                     | 96.10        |
|                                     | 5          | 0.20                | 3.90                     | 100.00       |
| Limestone quarry (C zone)           | 1          | 2.27                | 45.50                    | 45.50        |
|                                     | 2          | 1.49                | 29.73                    | 75.23        |
|                                     | 3          | 0.59                | 11.71                    | 86.94        |
|                                     | 4          | 0.41                | 8.18                     | 95.12        |

|                    |   |      |       |        |
|--------------------|---|------|-------|--------|
|                    | 5 | 0.24 | 4.88  | 100.00 |
|                    | 1 | 2.18 | 43.67 | 43.67  |
|                    | 2 | 1.38 | 27.52 | 71.19  |
| Iron mine (D zone) | 3 | 0.84 | 16.79 | 87.99  |
|                    | 4 | 0.51 | 10.22 | 98.20  |
|                    | 5 | 0.09 | 1.80  | 100.00 |

Table S5. Indices of non-carcinogenic risk for children.

| Indices | Non-Ferrous Metals Smelter<br>(A Zone) |      | Abandoned Copper Mine<br>(B Zone) |      | Limestone Quarry<br>(C Zone) |      | Iron Mine<br>(D Zone) |  |
|---------|----------------------------------------|------|-----------------------------------|------|------------------------------|------|-----------------------|--|
|         |                                        | Cu   | 0.29                              | 0.51 | 0.19                         | 0.16 |                       |  |
|         | Cr                                     | 0.13 | 0.22                              | 0.37 | 0.13                         |      |                       |  |
| THQ     | Pb                                     | 0.59 | 0.24                              | 0.27 | 0.11                         |      |                       |  |
|         | Cd                                     | 0.75 | 0.70                              | 0.60 | 0.25                         |      |                       |  |
|         | As                                     | 3.69 | 4.36                              | 3.02 | 0.50                         |      |                       |  |
| HI      |                                        | 5.45 | 6.03                              | 4.45 | 1.15                         |      |                       |  |

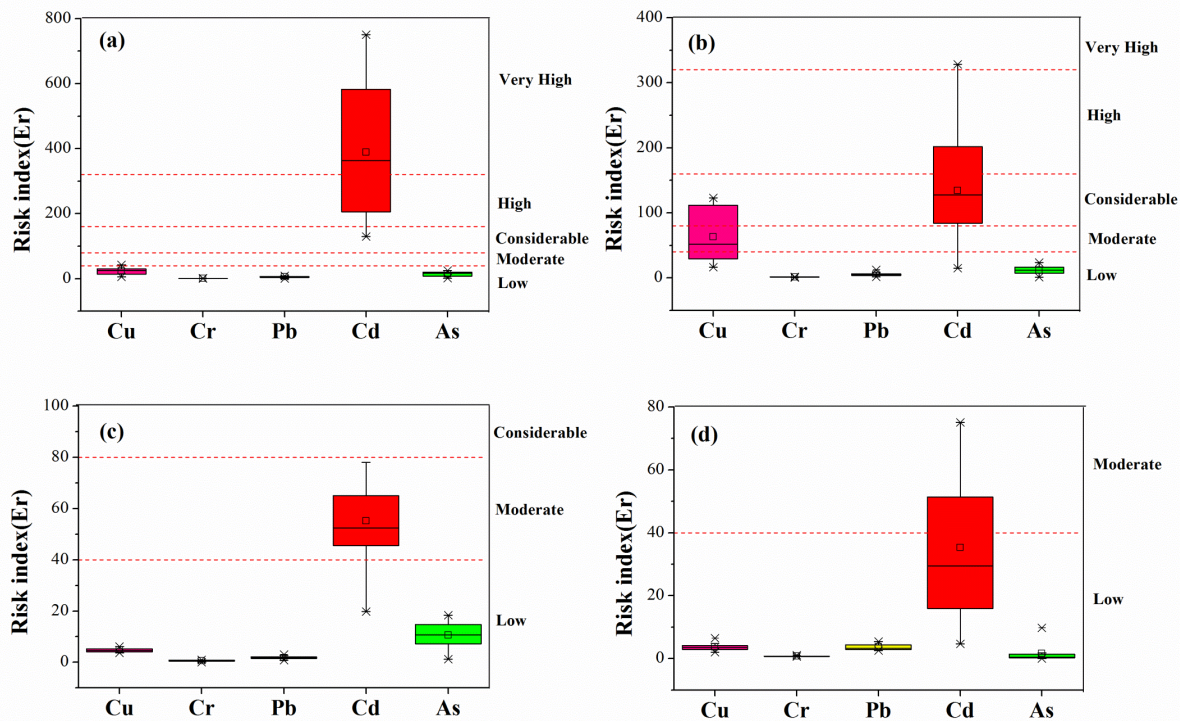

Figure S1. Potential ecological risk index (RI) of single element in the four zones: (a) Non-ferrous metals smelter; (b) Abandoned copper mine; (c) Limestone quarry; (d) Iron mine.

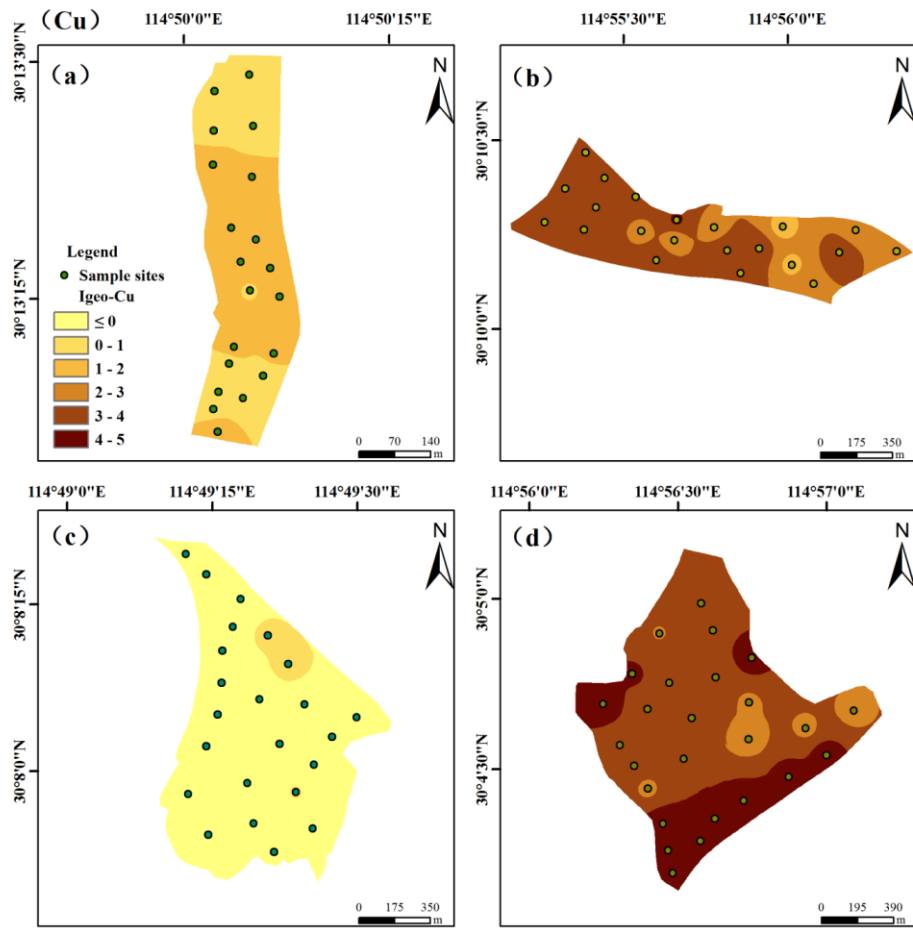

**Figure S2.** Spatial distribution pollution levels of Igeo-Cu in the four zones: (a) Non-ferrous metals smelter; (b) Abandoned copper mine; (c) Limestone quarry; (d) Iron mine.

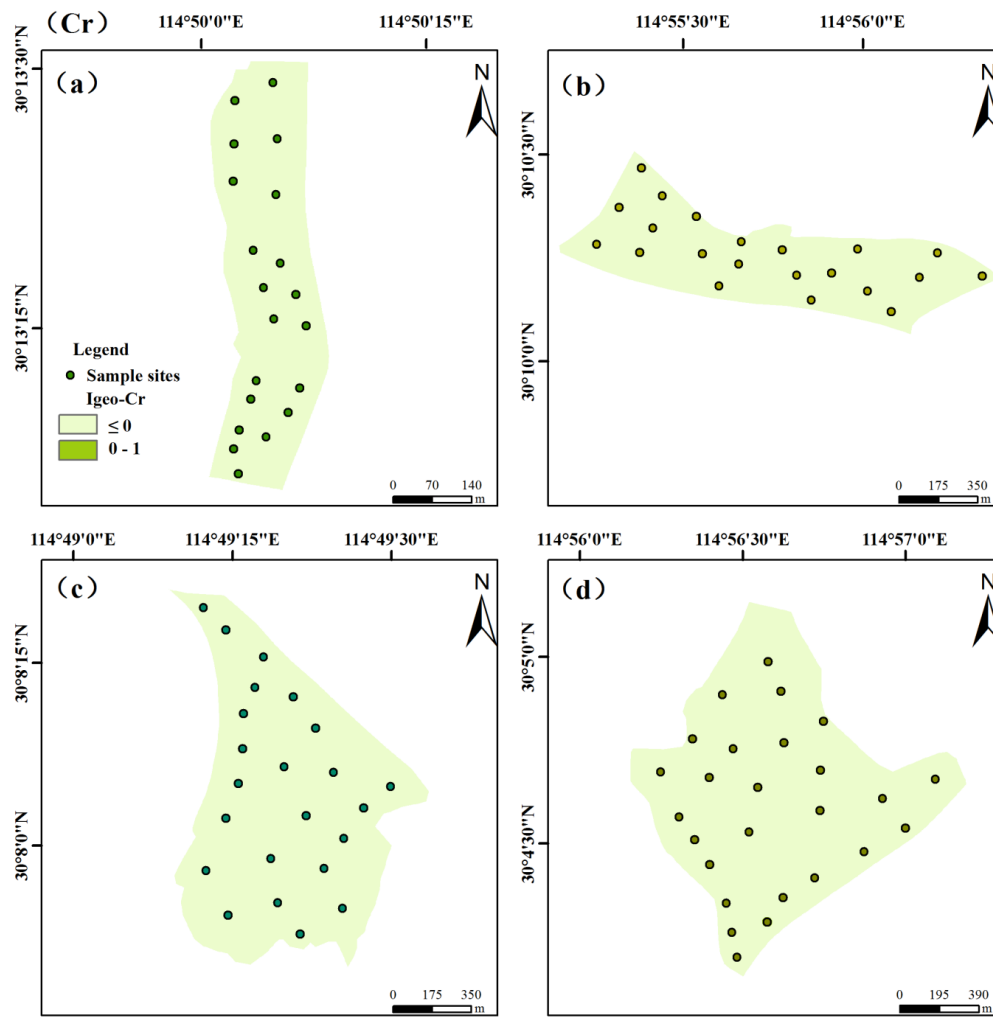

**Figure S3.** Spatial distribution pollution levels of Igeo-Cr in the four zones: (a) Non-ferrous metals smelter; (b) Abandoned copper mine; (c) Limestone quarry; (d) Iron mine.

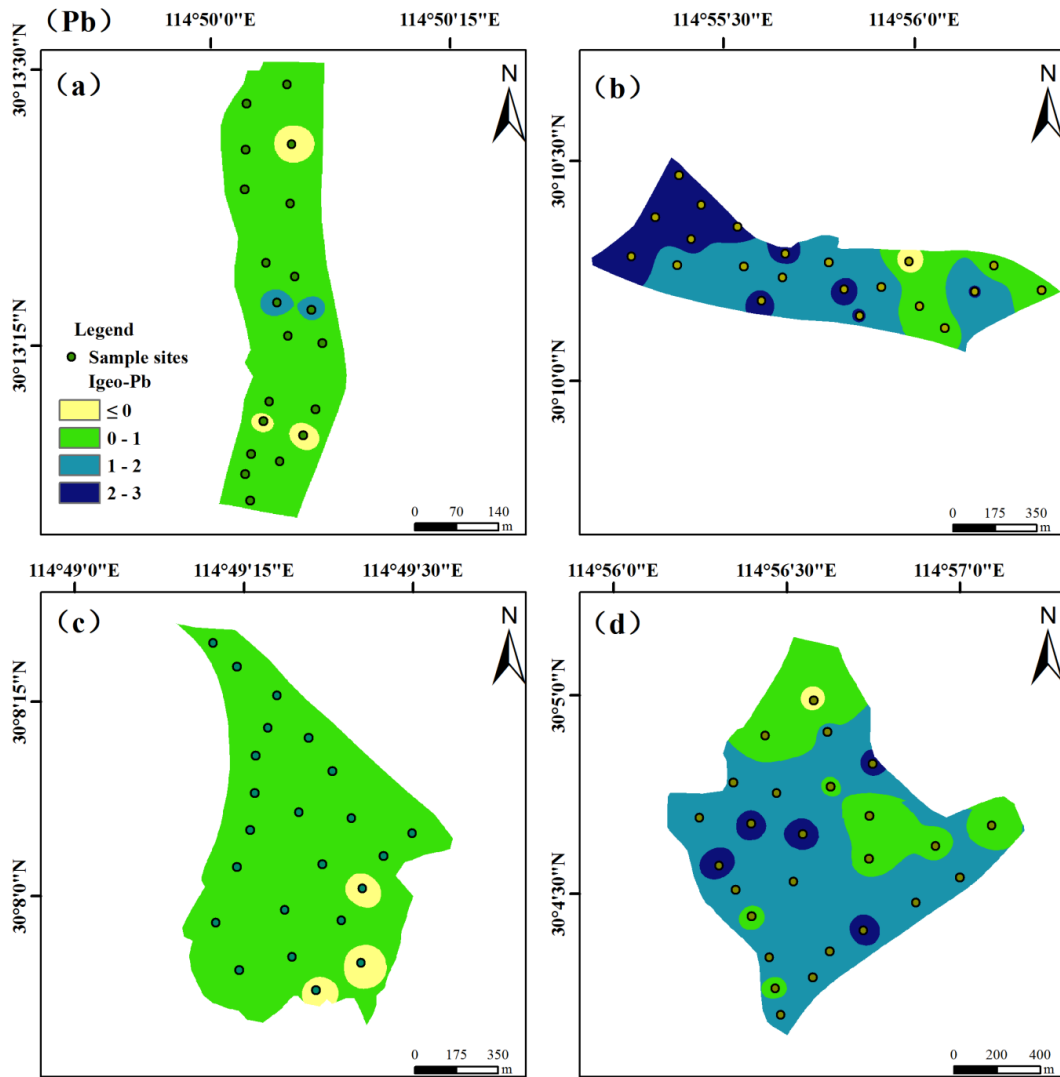

**Figure S4.** Spatial distribution pollution levels of Igeo-Pb in the four zones: (a) Non-ferrous metals smelter; (b) Abandoned copper mine; (c) Limestone quarry; (d) Iron mine.

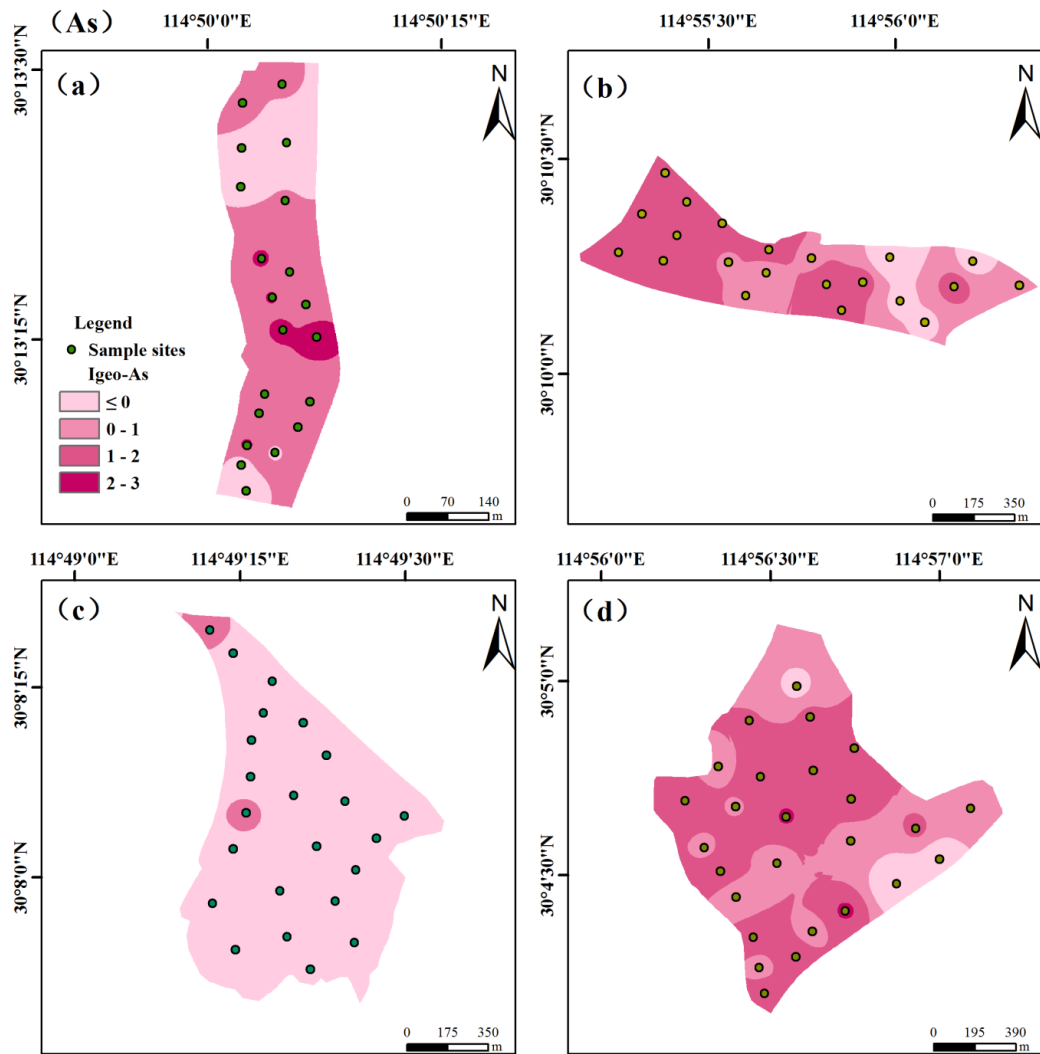

**Figure S5.** Spatial distribution pollution levels of Igeo-As in the four zones: (a) Non-ferrous metals smelter; (b) Abandoned copper mine; (c) Limestone quarry; (d) Iron mine.

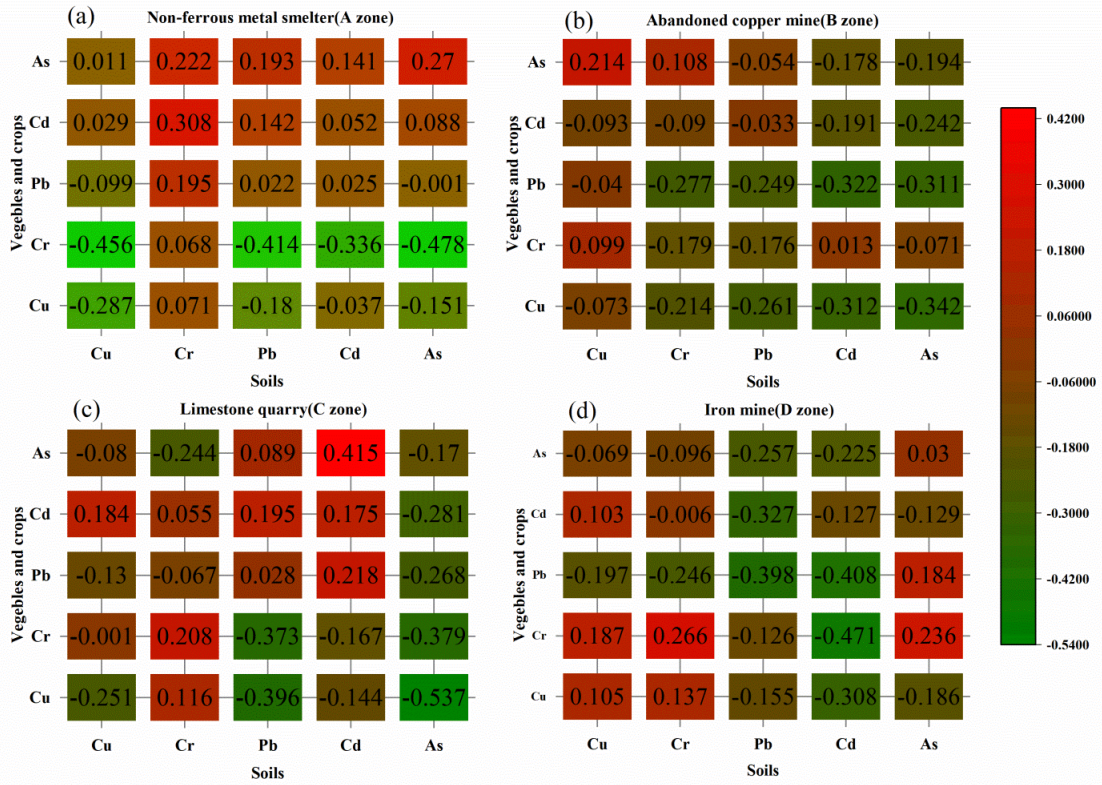

**Figure S6.** Correlation coefficients of heavy metals between soils and foodstuffs: (a) Non-ferrous metals smelter; (b) Abandoned copper mine; (c) Limestone quarry; (d) Iron mine.

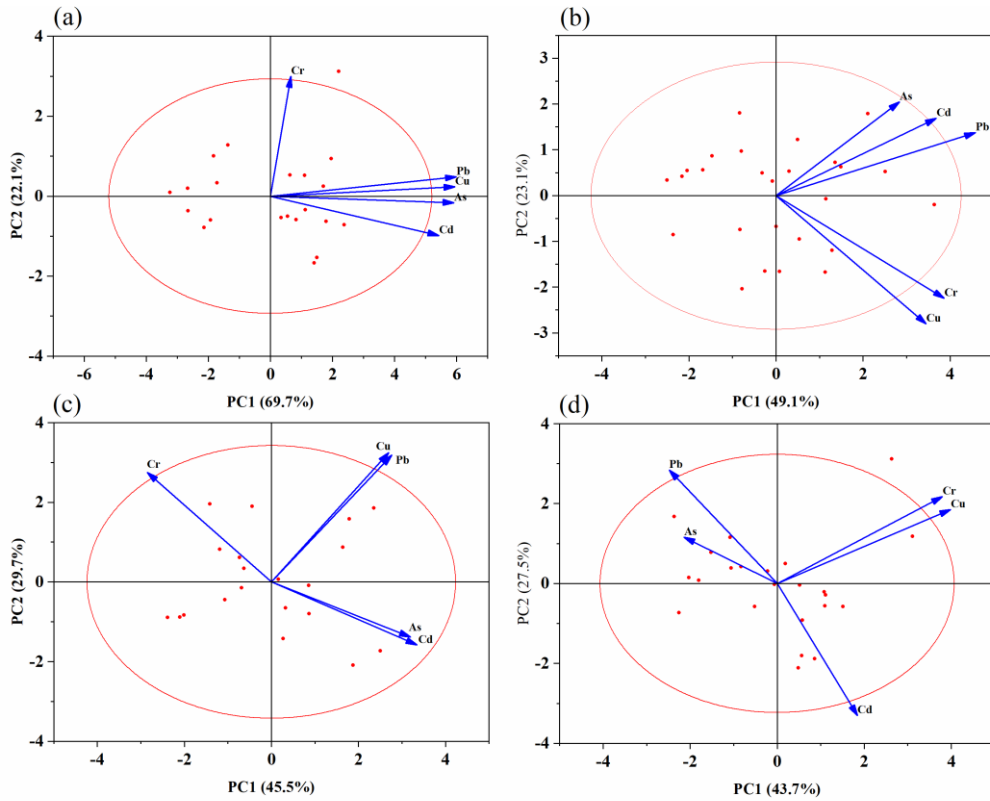

**Figure S7.** Principal component analysis for heavy metals of soils in the four zones: (a) Non-ferrous metals smelter; (b) Abandoned copper mine; (c) Limestone quarry; (d) Iron mine.



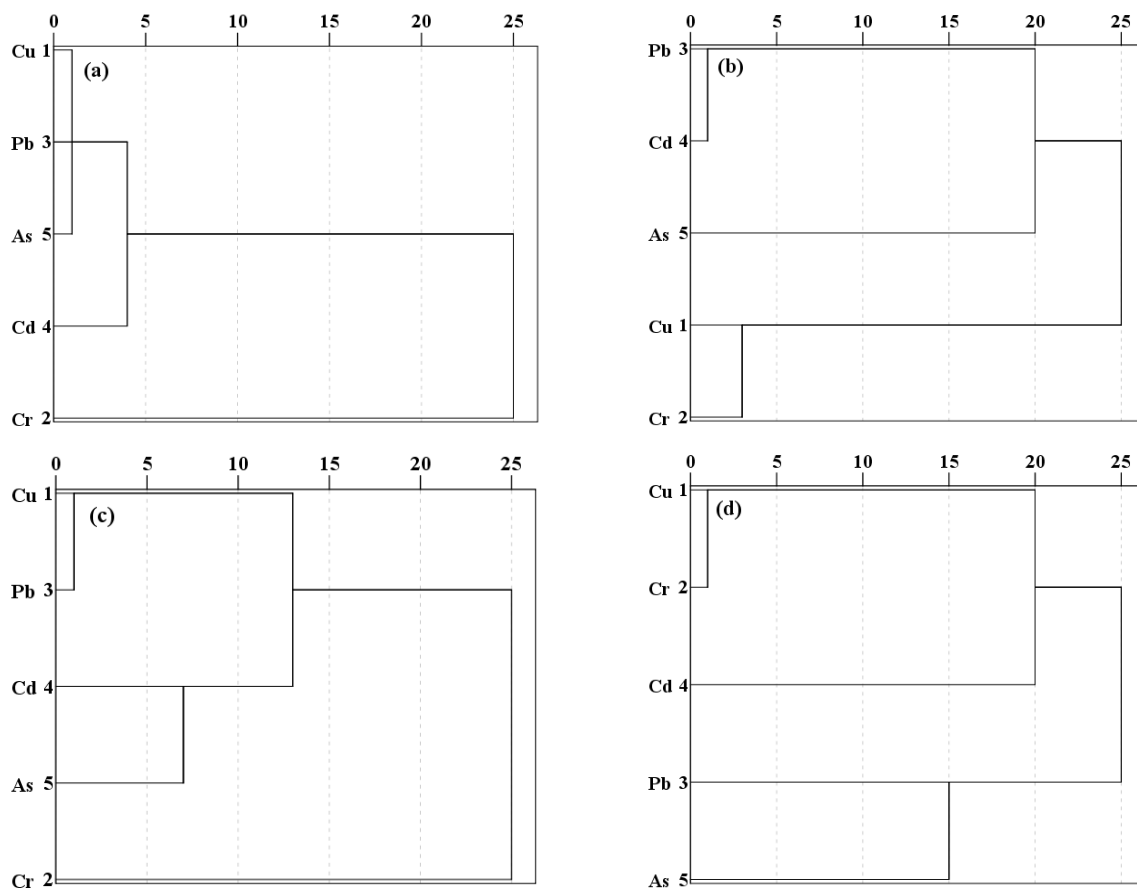

**Figure S8.** Cluster analysis (CA) results for five heavy metals of soils: (a) Non-ferrous metals smelter; (b) Abandoned copper mine; (c) Limestone quarry; (d) Iron mine.

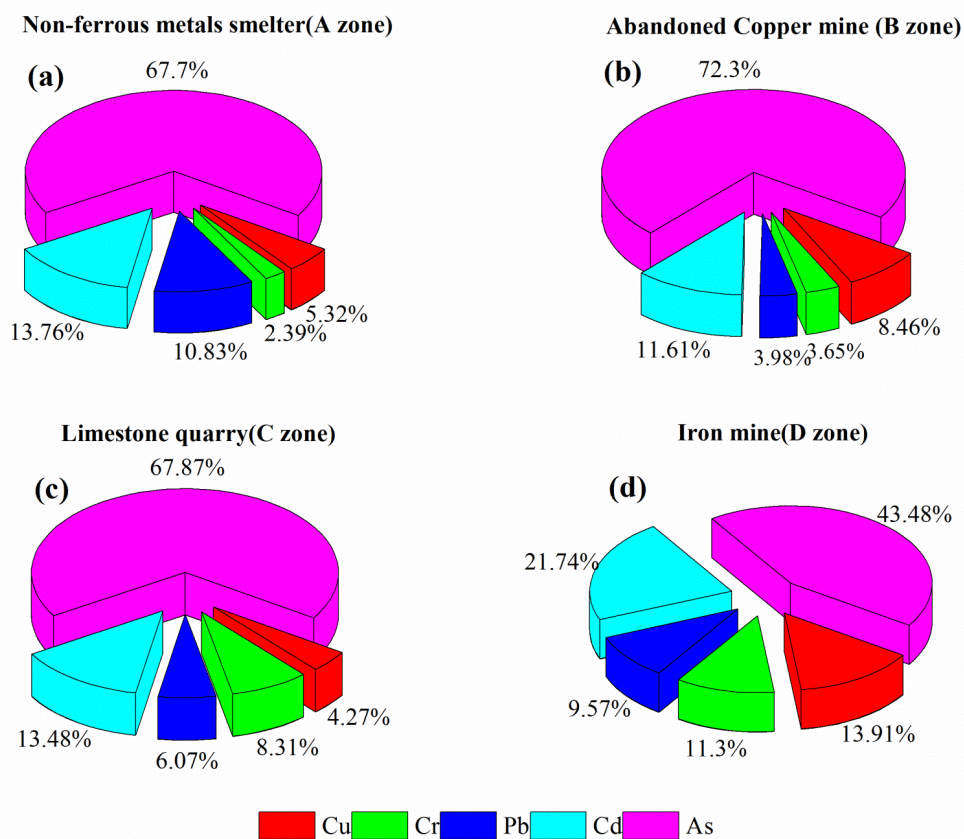

**Figure S9.** The health risk contribution rates of five different elements in the four zones: (a) Non-ferrous metals smelter; (b) Abandoned copper mine; (c) Limestone quarry; (d) Iron mine.
